# Supplementary material
Source: PubMed Central journal article supplement (PMC10449057)
Supplement: NIHMS1867259-supplement-Supplementary_Material.pdf [file NIHMS1867259-supplement-Supplementary_Material.pdf]

**Supplementary information**

---

**Multiphoton intravital microscopy of rodents**

---

In the format provided by the authors and unedited

## Supplementary information

### Multiphoton intravital microscopy of rodents

Colinda L G J Scheele<sup>1,2,#</sup>, David Herrmann<sup>3,4,#</sup>, Erika Yamashita<sup>5,6,7</sup>, Cristina Lo Celso<sup>8</sup>, Craig N Jenne<sup>9</sup>, Maja H Oktay<sup>10,11,12</sup>, David Entenberg<sup>10,11,12</sup>, Peter Friedl<sup>13, 14</sup>, Roberto Weigert<sup>15</sup>, Franck L B Meijboom<sup>16,17</sup>, Masaru Ishii<sup>5,6,7</sup>, Paul Timpson<sup>3,4,†</sup>, Jacco van Rheenen<sup>18, 19,†</sup>

- 1 Laboratory for Intravital Imaging and Dynamics of Tumor Progression, VIB Center for Cancer Biology, KU Leuven, Leuven, Belgium.
- 2 Department of Oncology, KU Leuven, Leuven, Belgium.
- 3 Cancer Ecosystems Program, Garvan Institute of Medical Research and The Kinghorn Cancer Centre, Cancer Department, Sydney, NSW, Australia.
- 4 St. Vincent's Clinical School, Faculty of Medicine, UNSW Sydney, Sydney, NSW, Australia.
- 5 Department of Immunology and Cell Biology, Graduate School of Medicine and Frontier Biosciences, Osaka University, Osaka, Japan.
- 6 8WPI-Immunology Frontier Research Center, Osaka University, Osaka, Japan.
- 7 Laboratory of Bioimaging and Drug Discovery, National Institutes of Biomedical Innovation, Health and Nutrition, Osaka, Japan.
- 8 Department of Life Sciences and Centre for Hematology, Imperial College London, London, United Kingdom; Sir Francis Crick Institute, London, United Kingdom.
- 9 Snyder Institute for Chronic Diseases, University of Calgary, Calgary, AB, Canada.
- 10 Department of Pathology, Albert Einstein College of Medicine / Montefiore Medical Center, Bronx, NY, USA.
- 11 Gruss-Lipper Biophotonics Center, Albert Einstein College of Medicine / Montefiore Medical Center, NY, USA.
- 12 Integrated Imaging Program, Albert Einstein College of Medicine / Montefiore Medical Center, NY, USA.
- 13 Department of Cell Biology, Radboud Institute for Molecular Life Sciences, Radboud University Medical Centre, Nijmegen, Netherlands.
- 14 David H. Koch Center for Applied Genitourinary Cancers, The University of Texas MD Anderson Cancer Center, Houston, United States.
- 15 Laboratory of Cellular and Molecular Biology, Center for Cancer Research, National Cancer Institute, National Institutes of Health, MD, USA
- 16 Department of Population Health Sciences, Sustainable Animal Stewardship, Faculty of Veterinary Medicine, Utrecht University, Utrecht, The Netherlands.
- 17 Faculty of Humanities, Ethics Institute, Utrecht University, Utrecht, The Netherlands.
- 18 Division of Molecular Pathology, The Netherlands Cancer Institute, Amsterdam, the Netherlands.
- 19 Oncode Institute-The Netherlands Cancer Institute, Amsterdam, the Netherlands.

# These authors contributed equally

†email: [p.timpson@garvan.org.au](mailto:p.timpson@garvan.org.au), [j.v.rheenen@nki.nl](mailto:j.v.rheenen@nki.nl)

**Supplementary Table 1: Image analysis software tools.** Non-exhaustive list of software tools that are available for image analysis detailing major functions and example applications.

| Analysis Step                          | Software                                                                            | Workflow/Major functions                                                                                                                                                                                                                                                                                                                                                                                                                                                                                                                                   | Applications                                                                                                                                             |
|----------------------------------------|-------------------------------------------------------------------------------------|------------------------------------------------------------------------------------------------------------------------------------------------------------------------------------------------------------------------------------------------------------------------------------------------------------------------------------------------------------------------------------------------------------------------------------------------------------------------------------------------------------------------------------------------------------|----------------------------------------------------------------------------------------------------------------------------------------------------------|
| <b>Motion correction</b>               | IVM Artifact Reduction Tool (IMART)                                                 | Achieve alignment and similarity by rigid registration of images to correct for overall movement followed by non-rigid registration to correct for small-scale aberrations/movements                                                                                                                                                                                                                                                                                                                                                                       | Stabilization of IVM data from kidney and liver <sup>1</sup>                                                                                             |
|                                        | Intravital_Microscopy_Toolbox (ImageJ Macro)                                        | Generation of a dissimilarity score between images of a series and reference frame with subsequent exclusion of frames with too high scores, also includes x-y alignment<br><br>Additional features for image processing include noise reduction or intensity projections                                                                                                                                                                                                                                                                                  | Stabilization of IVM data from brain, spinal cord, sciatic and enteric nerves <sup>2</sup>                                                               |
|                                        | Sequential Imaging Analysis (SIMA, Python package)                                  | Frame-by-frame alignment in relation to reference template (average of already aligned frames) followed by algorithm/model-based correction (Hidden Markov Model and Viterbi-based algorithm)<br><br>Additional applications for automated segmentation and signal extraction                                                                                                                                                                                                                                                                              | Motion correction of brain IVM data, ROI registration across longitudinal IVM in the same animal <sup>3,4</sup>                                          |
|                                        | Galene                                                                              | Extraction of individual photon arrival times followed by frame reconstruction based on intensity and rigid realignment to a reference frame to correct for overall movement and displacement estimation and fitting to correct for small scale aberrations                                                                                                                                                                                                                                                                                                | FLIM-FRET IVM of intestinal crypts, pancreas and cancer cell extravasation in the liver as well as FLIM IVM of the skin in human volunteers <sup>5</sup> |
|                                        | StackReg and HyperstackReg (ImageJ/Fiji plugins)                                    | Alignment of grey-scale or single-channel image stacks/series where each image serves as a template for alignment of subsequent image. Further development has led to HyperStackReg, which allows alignment of multichannel image stacks/series. 4D imaging data sets formatted as Hyperstacks within Fiji can be registered over time using a sub-pixel registration algorithm that minimizes the mean square difference of intensities between each subsequent time point. Registration may be based upon the intensities of one or more-color channels. | Alignment/registration, removal of residual PET/MRI imaging data as well as residual XY drift within intravital images <sup>6-8</sup>                    |
| <b>Segmentation</b>                    | Two Photon Processor (MATLAB package), Search for Neural Cells Accelerated (SeNeCA) | Real-time cell segmentation frame-by-frame with cell re-identification in subsequent frames. Additional image processing functions for real-time segmentation and annotation                                                                                                                                                                                                                                                                                                                                                                               | Cell segmentation in brain IVM data <sup>9</sup>                                                                                                         |
| <b>Segmentation and quantification</b> | Volumetric Tissue Exploration and Analysis (VTEA)                                   | Nuclear segmentation, cell identification and cell quantification                                                                                                                                                                                                                                                                                                                                                                                                                                                                                          | 3D <i>in situ</i> cytometry applications shown for kidney samples <sup>10</sup>                                                                          |
|                                        | DeepSynth                                                                           | nuclear segmentation based on deep learning approaches                                                                                                                                                                                                                                                                                                                                                                                                                                                                                                     | Cell segmentation in volumetric data of fluorescently stained kidney, liver and intestinal samples <sup>11</sup>                                         |

|                                                             |                                                           |                                                                                                                                                                                                                                |                                                                                                                                 |
|-------------------------------------------------------------|-----------------------------------------------------------|--------------------------------------------------------------------------------------------------------------------------------------------------------------------------------------------------------------------------------|---------------------------------------------------------------------------------------------------------------------------------|
|                                                             | Sphere Estimation Network (SphEsNet)                      | automated segmentation of nuclei and quantification of size                                                                                                                                                                    | Nuclei segmentation and quantification in kidney and intestine <sup>12</sup>                                                    |
|                                                             | Jelly filling framework                                   | segmentation of 3D data into lumen and boundaries upon multitarget labelling in 3D imaging data                                                                                                                                | 3D imaging data from kidney imaging, liver imaging and human breast mammographies <sup>13</sup>                                 |
|                                                             | CellProfiler                                              | Cell/nuclear segmentation followed by quantification of cellular or subcellular size, shape, intensity and texture                                                                                                             | Calcium IVM in mouse brain <sup>14</sup>                                                                                        |
|                                                             | Icy                                                       | free, open-source and open community bioimage informatics platform to process (visualize, annotate and quantify) imaging data                                                                                                  | Presentation of software tool and features <sup>15</sup>                                                                        |
|                                                             | N/A                                                       | Nuclei segmentation and automatic processing                                                                                                                                                                                   | Classification of FUCCI cell cycle imaging data <sup>16</sup>                                                                   |
|                                                             | PIVlab                                                    | Data segmentation and plotting of velocity vectors                                                                                                                                                                             | Quantification of tissue flow (speed and directionality) in embryos <sup>17</sup>                                               |
| <b>Deconvolution, tracking/quantification, 3D rendering</b> | BioImageXD                                                | Open-source general-purpose tool incorporating a range of processing tools including deconvolution, tracking/quantification, 3D rendering and measurements                                                                     | Assessment of integrin clustering, movement and internalization <sup>18</sup>                                                   |
| <b>Segmentation, tracking and lineage tracing</b>           | Lineage Editing and Validation (LEVER)                    | free open-source software for segmentation, tracking and lineage tracing of cells (lineage trees) as well as quantification of cell shape, size, location and movement                                                         | Longitudinal imaging of neural progenitor cells <sup>19</sup>                                                                   |
|                                                             | N/A                                                       | Open-source platform for segmentation and tracking of nuclei for reconstruction of cell lineages                                                                                                                               | Show applications in embryonic organisms, e.g., Drosophila, zebrafish and mouse <sup>20</sup>                                   |
| <b>Cell tracking and lineage tracing</b>                    | tTt and qTfy                                              | tTt tool for cell tracking and qTfy tool for segmentation/quantification of cellular and molecular features (e.g., fluorescence, ratio of fluorescence from different channels, tracking of cellular/subcellular localization) | Tracking and tracing of embryonic stem cells <sup>21</sup>                                                                      |
|                                                             | TrackMate (Fiji plugin)                                   | Cell/particle tracking and lineage tracing                                                                                                                                                                                     | Tracing of cell lineages and tracking of molecular clusters <sup>22,23</sup>                                                    |
| <b>3D rendering of imaging data</b>                         | Voxx                                                      | Voxel-based 3D imaging program for 3D rendering of IVM data that does not require high-end computing power, allows almost real-time rendering                                                                                  | Rendering of kidney and heart imaging data <sup>24</sup>                                                                        |
| <b>Quantification/prediction of branching morphogenesis</b> | Models of branching and annihilating random walks (BARWs) | Modelling of branching morphogenesis based on local rules                                                                                                                                                                      | Quantification/prediction of branching morphogenesis in murine mammary and kidney as well as human adult prostate <sup>25</sup> |
| <b>Denoising</b>                                            | BM3D algorithm                                            | De-noising tool for IVM data, based on local and non-local redundancy in images                                                                                                                                                | IVM of nanoparticles and gut mucosa <sup>26</sup>                                                                               |

|                                                             |                                                                                           |                                                                                                                                                                                                                                                                                            |                                                                                                                             |
|-------------------------------------------------------------|-------------------------------------------------------------------------------------------|--------------------------------------------------------------------------------------------------------------------------------------------------------------------------------------------------------------------------------------------------------------------------------------------|-----------------------------------------------------------------------------------------------------------------------------|
|                                                             |                                                                                           | (morphological features) followed by image grouping and de-noising via algorithm                                                                                                                                                                                                           |                                                                                                                             |
| <b>ECM analysis</b>                                         | Gray-Level Co-occurrence Matrix (GLCM) analysis (MATLAB-based)                            | Quantification of matrix fiber organization using texture analysis tool                                                                                                                                                                                                                    | SHG imaging data of fibrillar collagen I from healthy and diseased skin samples <sup>27</sup>                               |
|                                                             | N/A                                                                                       | Computational fluid dynamics (CFD) approach to analyze and quantify ECM features                                                                                                                                                                                                           | Analysis of de-cellularized heart ECM samples and quantification of dynamic changes in ECM upon heart failure <sup>28</sup> |
|                                                             | TWOMBLI (Fiji Macro)                                                                      | Analysis of ECM networks with potential to also be used for analysis of other networks                                                                                                                                                                                                     | Quantification of ECM features in cell-derived matrices (CDMs) mouse tissues and patient/tissue biopsies <sup>29</sup>      |
|                                                             | Fiber Finding Algorithm (FFA)                                                             | Identification and tracking of individual ECM fibers                                                                                                                                                                                                                                       | Collagen gels <sup>30</sup>                                                                                                 |
| <b>Analysis of vasculature</b>                              | N/A                                                                                       | Algorithm to calculate / derive red blood cell (RBC) velocity and determine volumetric flow rates, radial velocity profiles, wall shear rate and stress                                                                                                                                    | Assessment of dynamic behavior and interactions of/between blood cells and vessel walls <sup>31</sup>                       |
|                                                             | Spatial Temporal Analysis of Fieldwise Flow (STAFF, Fiji-based)                           | automated analysis of microvascular flow                                                                                                                                                                                                                                                   | Analysis of microvascular flow IVM in liver <sup>32,33</sup>                                                                |
|                                                             | N/A                                                                                       | Vessel diameter calculation as full width at half-maximum (FWHM) of vasculature                                                                                                                                                                                                            | Quantification of vascular features in the live brain (cranial window) <sup>34</sup>                                        |
|                                                             | Relative Velocity, Direction, and Morphology (RVDM)                                       | Use of FWHM method to quantify vessel diameter with calibration of beads of known size, generation of 3D velocity maps, velocity assessment based on changes in RBC shape (distortion from round shape [elongation]) linked to scan speed in relation to blood flow velocity and direction | Fluorescent data and also looking at vessel leakage, using example of IVM of (micro)vasculature in ear dermis <sup>35</sup> |
| <b>Removal of noise/endogenous fluorescence</b>             | Digital Enhancement of Fibers with Noise Elimination (DEFINE, open-source macro for Fiji) | Relies on broad emission range of endogenous fluorescence, acquisition of images using fluorescent channels and lower wavelength autofluorescence (where fluorophores do not emit anymore) followed by subtraction of endogenous fluorescence using DEFINE                                 | Imaging of axonal projections in the brain <sup>36</sup>                                                                    |
| <b>Spectral unmixing/removal of endogenous fluorescence</b> | Learning Unsupervised Means of Spectra (LUMoS)                                            | Spectral unmixing tool based on unsupervised learning of the spectral signatures of fluorophores                                                                                                                                                                                           | Spectral unmixing as well as reduction/removal of endogenous fluorescence <sup>37</sup>                                     |
| <b>Phasor-based segmentation of FLIM data</b>               | Kmeans FLIM phasors                                                                       | Unbiased phasor approach using unsupervised machine learning (K-means clustering), shown to outperform manual selection                                                                                                                                                                    | FLIM imaging data of the kidney <sup>38</sup>                                                                               |
| <b>FLIM data analysis</b>                                   | FLIMfit                                                                                   | Phasor based data segmentation to remove endogenous fluorescence, global fitting of FLIM data to monoexponential or multiexponential decays, generation of                                                                                                                                 | Fitting/quantification/analysis of FRET biosensor imaging, Homo-FRET/anisotropy                                             |

|                                                                  |                             |                                                                                                                           |                                                                                                                                             |
|------------------------------------------------------------------|-----------------------------|---------------------------------------------------------------------------------------------------------------------------|---------------------------------------------------------------------------------------------------------------------------------------------|
|                                                                  |                             | intensity merged FLIM images and FLIM images without intensity information                                                | imaging and metabolic FLIM data <sup>5, 39, 40</sup>                                                                                        |
| <b>Spectral unmixing</b>                                         | HyperSpectral Phasor (HySP) | Conversion and mapping of each photon across fluorescence spectrum on phasor plot                                         | Unmixing of 5D hyperspectral imaging data with up to 7 signals <sup>41</sup>                                                                |
| <b>Removal of endogenous fluorescence and FLIM data analysis</b> | Phasor application          | Transformation of histograms of time delays for each pixel into phasor/vector followed by 2D mapping of phasors per pixel | Segmentation/analysis of imaging data from FPs, FRET biosensors as well as segmentation/removal of endogenous fluorescence <sup>42,43</sup> |

## References

- Dunn, K. W., Lorenz, K. S., Salama, P. & Delp, E. J. IMART software for correction of motion artifacts in images collected in intravital microscopy. *Intravital* 3, e28210 (2014).
- Soulet, D., Pare, A., Coste, J. & Lacroix, S. Automated filtering of intrinsic movement artifacts during two-photon intravital microscopy. *PLoS One* 8, e53942 (2013).
- Kaifosh, P., Zaremba, J. D., Danielson, N. B. & Losonczy, A. SIMA: Python software for analysis of dynamic fluorescence imaging data. *Front Neuroinform* 8, 80 (2014).
- Kaifosh, P., Lovett-Barron, M., Turi, G. F., Reardon, T. R. & Losonczy, A. Septo-hippocampal GABAergic signaling across multiple modalities in awake mice. *Nat Neurosci* 16, 1182–1184 (2013).
- Warren, S. C. *et al.* Removing physiological motion from intravital and clinical functional imaging data. *Elife* 7, (2018).
- Thevenaz, P., Ruttimann, U. E. & Unser, M. A pyramid approach to subpixel registration based on intensity. *IEEE Trans Image Process* 7, 27–41.
- Sharma, V. P. *et al.* Live tumor imaging shows macrophage induction and TME-mediated enrichment of cancer stem cells during metastatic dissemination. *Nat Commun* 12, 7300 (2021).
- Sharma, V. ImageJ plugin HyperStackReg V5.6. (2018) doi:10.5281/ZENODO.2252521.
- Tomek, J., Novak, O. & Syka, J. Two-Photon Processor and SeNeCA: a freely available software package to process data from two-photon calcium imaging at speeds down to several milliseconds per frame. *J Neurophysiol* 110, 243–256 (2013).
- Winfree, S. *et al.* Quantitative Three-Dimensional Tissue Cytometry to Study Kidney Tissue and Resident Immune Cells. *J Am Soc Nephrol* 28, 2108–2118 (2017).
- Dunn, K. W. *et al.* DeepSynth: Three-dimensional nuclear segmentation of biological images using neural networks trained with synthetic data. *Sci Rep* 9, 18295 (2019).
- Ho, D. J. *et al.* Sphere estimation network: three-dimensional nuclei detection of fluorescence microscopy images. *J Med Imaging (Bellingham)* 7, 44003 (2020).
- Gadgil, N. J., Salama, P., Dunn, K. W. & Delp, E. J. Segmentation of biological images containing multitarget labeling using the jelly filling framework. *J Med Imaging (Bellingham)* 5, 44006 (2018).
- Carpenter, A. E. *et al.* CellProfiler: image analysis software for identifying and quantifying cell phenotypes. *Genome Biol* 7, R100 (2006).
- F, C. *et al.* Icy: an open bioimage informatics platform for extended reproducible research. *Nat Methods* 2012;9(7):, 690–696 (2012).
- Narotamo, H. *et al.* A machine learning approach for single cell interphase cell cycle staging. *Sci Rep* 11, 19278 (2021).
- Omelchenko, T., Hall, A. & Anderson, K. V. beta-Pix-dependent cellular protrusions propel collective mesoderm migration in the mouse embryo. *Nat Commun* 11, 6066 (2020).
- Kankaanpaa, P. *et al.* BioImageXD: an open, general-purpose and high-throughput image-processing platform. *Nat Methods* 9, 683–689 (2012).
- Winter, M. *et al.* Vertebrate neural stem cell segmentation, tracking and lineaging with validation and editing. *Nat Protoc* 6, 1942–1952 (2011).
- Amat, F. *et al.* Fast, accurate reconstruction of cell lineages from large-scale fluorescence microscopy data. *Nat Methods* 11, 951–958 (2014).
- Hilsenbeck, O. *et al.* Software tools for single-cell tracking and quantification of cellular and molecular properties. *Nat Biotechnol* 34, 703–706 (2016).
- Ershov, D. *et al.* TrackMate 7: integrating state-of-the-art segmentation algorithms into tracking pipelines. *Nature Methods* 2022 1–4 (2022) doi:10.1038/s41592-022-01507-1.
- Tinevez, J. Y. *et al.* TrackMate: An open and extensible platform for single-particle tracking. *Methods* 115, 80–90 (2017).
- Clendenon, J. L., Phillips, C. L., Sandoval, R. M., Fang, S. & Dunn, K. W. Voxx: a PC-based, near real-time volume rendering system for biological microscopy. *Am J Physiol Cell Physiol* 282, C213-8 (2002).
- Hannezo, E. *et al.* A Unifying Theory of Branching Morphogenesis. *Cell* 171, 242-255.e27 (2017).
- Bolke, T. *et al.* Data-adaptive image-denoising for detecting and quantifying nanoparticle entry in mucosal tissues through intravital 2-photon microscopy. *Beilstein J Nanotechnol* 5, 2016–2025 (2014).
- Cicchi, R. *et al.* Scoring of collagen organization in healthy and diseased human dermis by multiphoton microscopy. *J Biophotonics* 3, 34–43 (2010).

28. Perestrelo, A. R. *et al.* Multiscale Analysis of Extracellular Matrix Remodeling in the Failing Heart. *Circ Res* 128, 24–38 (2021).
29. Wershof, E. *et al.* A FIJI macro for quantifying pattern in extracellular matrix. *Life Sci Alliance* 4, (2021).
30. Rossen, N. S., Kyrsting, A., Giaccia, A. J., Erler, J. T. & Oddershede, L. B. Fiber finding algorithm using stepwise tracing to identify biopolymer fibers in noisy 3D images. *Biophys J* 120, 3860–3868 (2021).
31. Ortiz, D., Briceno, J. C. & Cabrales, P. Microhemodynamic parameters quantification from intravital microscopy videos. *Physiol Meas* 35, 351–367 (2014).
32. Clendenon, S. G. *et al.* Spatial Temporal Analysis of Fieldwise Flow in Microvasculature. *J Vis Exp* (2019) doi:10.3791/60493.
33. Clendenon, S. G. *et al.* A simple automated method for continuous fieldwise measurement of microvascular hemodynamics. *Microvasc Res* 123, 7–13 (2019).
34. Driscoll, J. D., Shih, A. Y., Drew, P. J., Cauwenberghs, G. & Kleinfeld, D. Two-photon imaging of blood flow in the rat cortex. *Cold Spring Harb Protoc* 2013, 759–767 (2013).
35. Honkura, N. *et al.* Intravital imaging-based analysis tools for vessel identification and assessment of concurrent dynamic vascular events. *Nat Commun* 9, 2746 (2018).
36. Powell, J. M., Plummer, N. W., Scappini, E. L., Tucker, C. J. & Jensen, P. DEFINe: A Method for Enhancement and Quantification of Fluorescently Labeled Axons. *Front Neuroanat* 12, 117 (2018).
37. McRae, T. D., Oleksyn, D., Miller, J. & Gao, Y. R. Robust blind spectral unmixing for fluorescence microscopy using unsupervised learning. *PLoS One* 14, e0225410 (2019).
38. Zhang, Y. *et al.* Automatic segmentation of intravital fluorescence microscopy images by K-means clustering of FLIM phasors. *Opt Lett* 44, 3928–3931 (2019).
39. Conway, J. R. W., Warren, S. C. & Timpson, P. Context-dependent intravital imaging of therapeutic response using intramolecular FRET biosensors. *Methods* 128, 78–94 (2017).
40. Warren, S. C. *et al.* Rapid global fitting of large fluorescence lifetime imaging microscopy datasets. *PLoS One* 8, e70687 (2013).
41. Cutrale, F. *et al.* Hyperspectral phasor analysis enables multiplexed 5D in vivo imaging. *Nat Methods* 14, 149–152 (2017).
42. Grecco, H. E., Roda-Navarro, P. & Verveer, P. J. Global analysis of time correlated single photon counting FRET-FLIM data. *Opt Express* 17, 6493–6508 (2009).
43. Digman, M. A., Caiolfa, V. R., Zamai, M. & Gratton, E. The phasor approach to fluorescence lifetime imaging analysis. *Biophys J* 94, L14-6 (2008).
